# Supplementary material for: Exploring the carbon and nitrogen removal capacity of a membrane aerated biofilm reactor for low-strength municipal wastewater treatment
Source: Royal Society of Chemistry journal article supplement (doi:10.1039/d1ew00724f), 2021-12-24
Supplement: d1ew00724f1.pdf [file d1ew00724f1.pdf]

# **Exploring carbon and nitrogen removal capacity of membrane aerated biofilm reactor for low-strength municipal wastewater treatment**

Li-Qiu Zhang <sup>a,b</sup>, Xing Jiang <sup>a,b</sup>, Hong-Wei Rong <sup>a,b</sup>, Chun-Hai Wei <sup>\*a,b</sup>, Min Luo <sup>c</sup>,  
Wen-Chao Ma <sup>c</sup>, How-Yong Ng <sup>d</sup>

<sup>a</sup> Department of Municipal Engineering, School of Civil Engineering, Guangzhou University, Guangzhou 510006, China

<sup>b</sup> Key Laboratory for Water Quality and Conservation of the Pearl River Delta, Ministry of Education, Guangzhou 510006, China

<sup>c</sup> SUEZ Water Technologies (Shanghai) Co. Ltd., Shanghai 201210, China

<sup>d</sup> Department of Civil and Environmental Engineering, National University of Singapore, Singapore 117576, Singapore

\*Correspondence: weich@gzhu.edu.cn; Tel.: +86-20-3936-6656

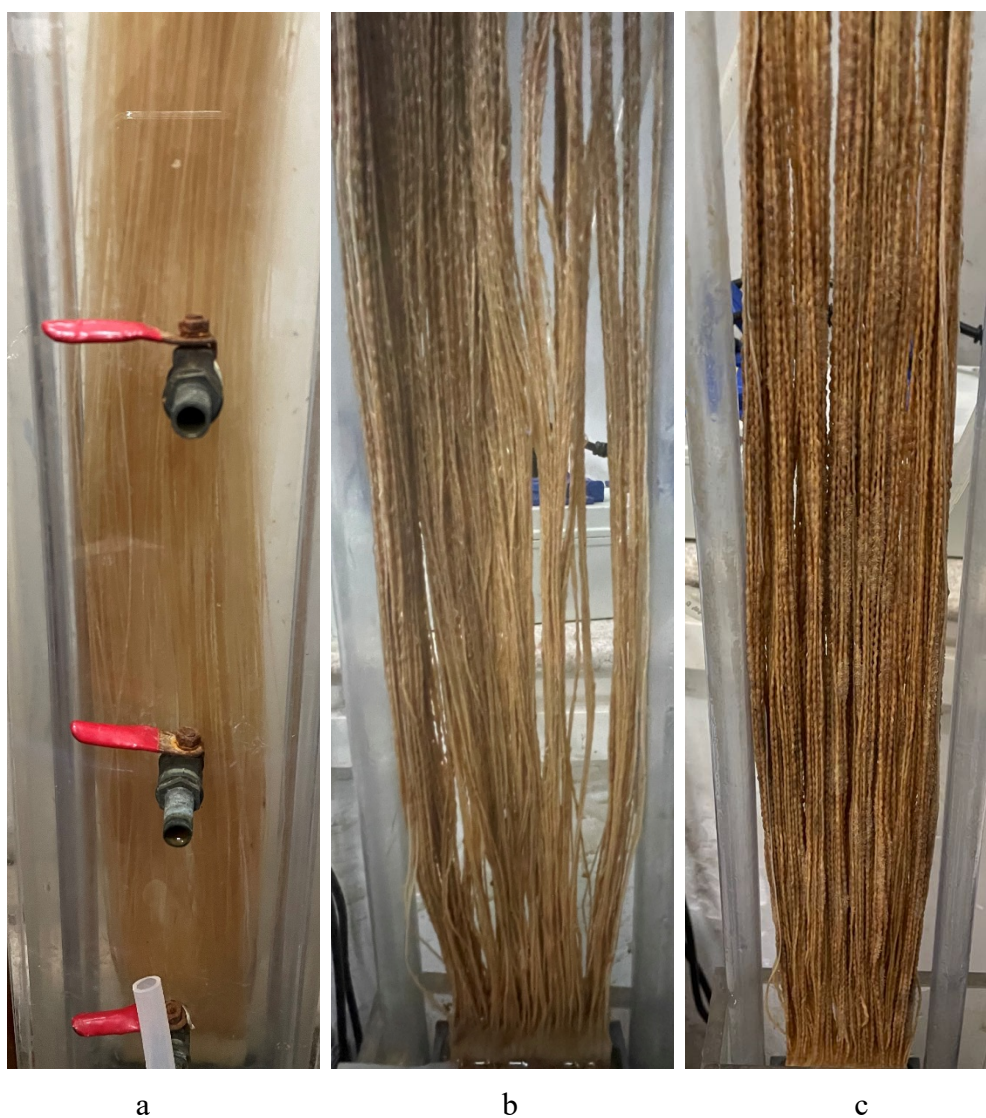

**Fig. S1.** Visualization of MABR biofilm with time (a. biofilm enrichment; b. HRT=8 h; c. HRT=3h)
